# Supplementary material
Source: PubMed Central journal article supplement (PMC9203081)
Supplement: boe-13-5-3131-s001.pdf [file boe-13-5-3131-s001.pdf]

## Millimeter waves alter DNA secondary structures and modulate the transcriptome in human fibroblasts: supplement

**NICHOLAS B. LAWLER,<sup>1,2</sup>  CAMERON W. EVANS,<sup>2</sup> SERGII ROMANENKO,<sup>3</sup>  NUTAN CHAUDHARI,<sup>2</sup> MARK FEAR,<sup>4</sup> FIONA WOOD,<sup>5</sup> NICOLE M. SMITH,<sup>2,6</sup> VINCENT P. WALLACE,<sup>1,7</sup> AND K. SWAMINATHAN IYER<sup>2,8</sup>**

<sup>1</sup>*Department of Physics, The University of Western Australia, Perth, WA 6009, Australia*

<sup>2</sup>*School of Molecular Sciences, The University of Western Australia, Perth, WA 6009, Australia*

<sup>3</sup>*Department of Sensory Signaling, O.O. Bogomolets Institute of Physiology, National Academy of Sciences of Ukraine, Kyiv, 01601, Ukraine*

<sup>4</sup>*Burn Injury Research Unit, School of Biomedical Sciences, University of Western Australia, Perth, WA 6009, Australia*

<sup>5</sup>*Fiona Stanley and Princess Margaret Hospitals, Burns Service of Western Australia, Perth, WA, Australia*

<sup>6</sup>*nicole.smith@uwa.edu.au*

<sup>7</sup>*vincent.wallace@uwa.edu.au*

<sup>8</sup>*swaminatha.iyer@uwa.edu.au*

---

This supplement published with Optica Publishing Group on 28 April 2022 by The Authors under the terms of the [Creative Commons Attribution 4.0 License](https://creativecommons.org/licenses/by/4.0/) in the format provided by the authors and unedited. Further distribution of this work must maintain attribution to the author(s) and the published article's title, journal citation, and DOI.

Supplement DOI: <https://doi.org/10.6084/m9.figshare.19609407>

Parent Article DOI: <https://doi.org/10.1364/BOE.458478>

# Millimeter waves alter DNA secondary structures and modulate the transcriptome in human fibroblasts

## Supplemental Figures

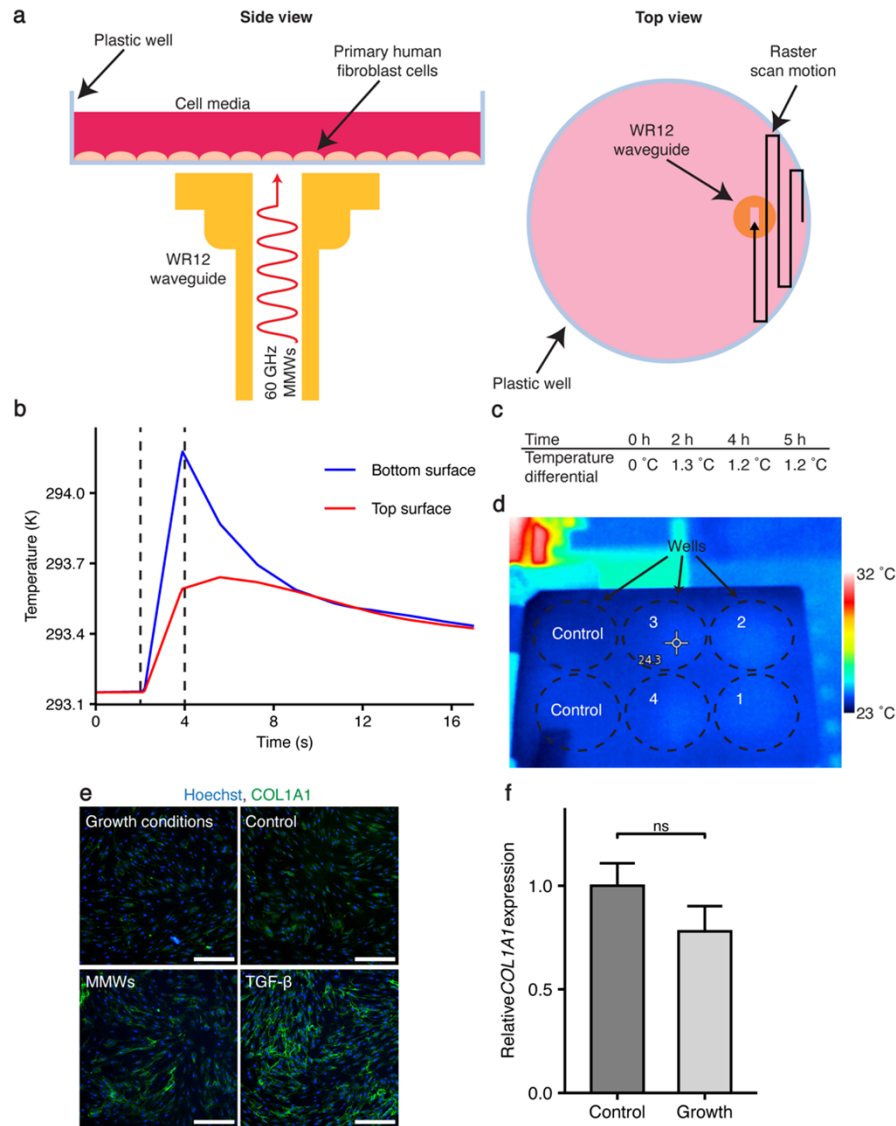

**Fig. S1. MMWs cause negligible thermal effects and cell controls do not differ significantly from growth conditions.** (a) Experimental setup of the MMW exposure. (b) Computational modelling of the temperature of the top and bottom surface of cell growth media during raster scan MMW exposure. The dashed lines at  $t = 2$  s and  $4$  s represent the start and end of the period of the raster scan where the simulated point in the well is above the MMW beam (c) Temperature differential between MMW exposed and control wells of the 6-well plate measured by a thermal probe after 0, 2, 4 and 5 h of MMW exposure. (d) Infrared image of the MMW exposed cells in a 6-well after 5 h shows heating of the most recently exposed well (well 2) and currently exposed cell (well 3) is only  $1$  °C. The raster scan passes the 4 numbered wells over the MMW beam in numerical order and repeats once the cycle is complete. (e) Representative fluorescent images

of day 4 fibroblasts in growth and control conditions, MMW exposed, and TGF- $\beta$  treated primary human fibroblasts stained with a COL1A1 specific antibody (green) shows no difference in collagen deposition in growth and control conditions (green: COL1A1, blue: nuclei, Hoechst 34580; magnification: 10x; numerical aperture: 0.45; scale bar: 300  $\mu$ m). (f) Relative expression of COL1A1 mRNA after 2 days in either control or growth conditions, determined via qPCR. Data is represented by mean  $\pm$  SEM from three biological replicates (n = 3).

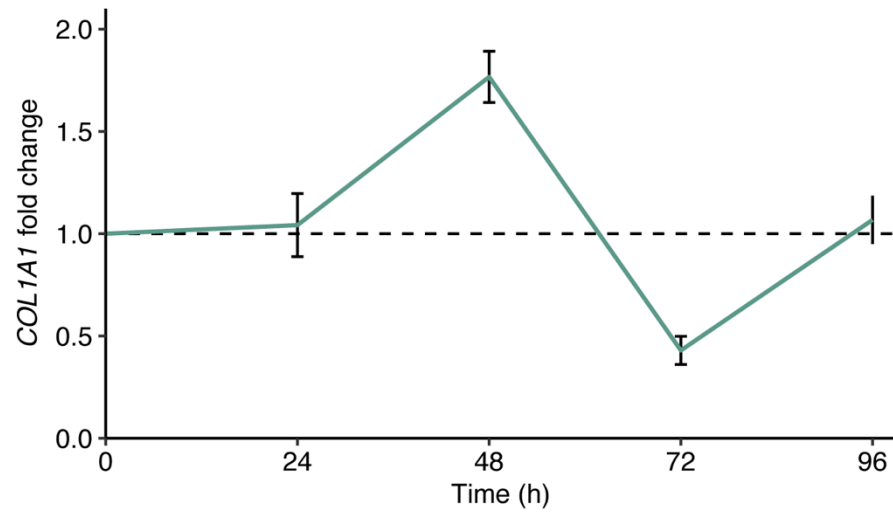

**Fig. S2. MMWs cause time-dependent modification to COL1A1 expression.** Relative expression of COL1A1 mRNA over time, characterised by qPCR. Data is represented as mean  $\pm$  SEM. 1 biological replicate.

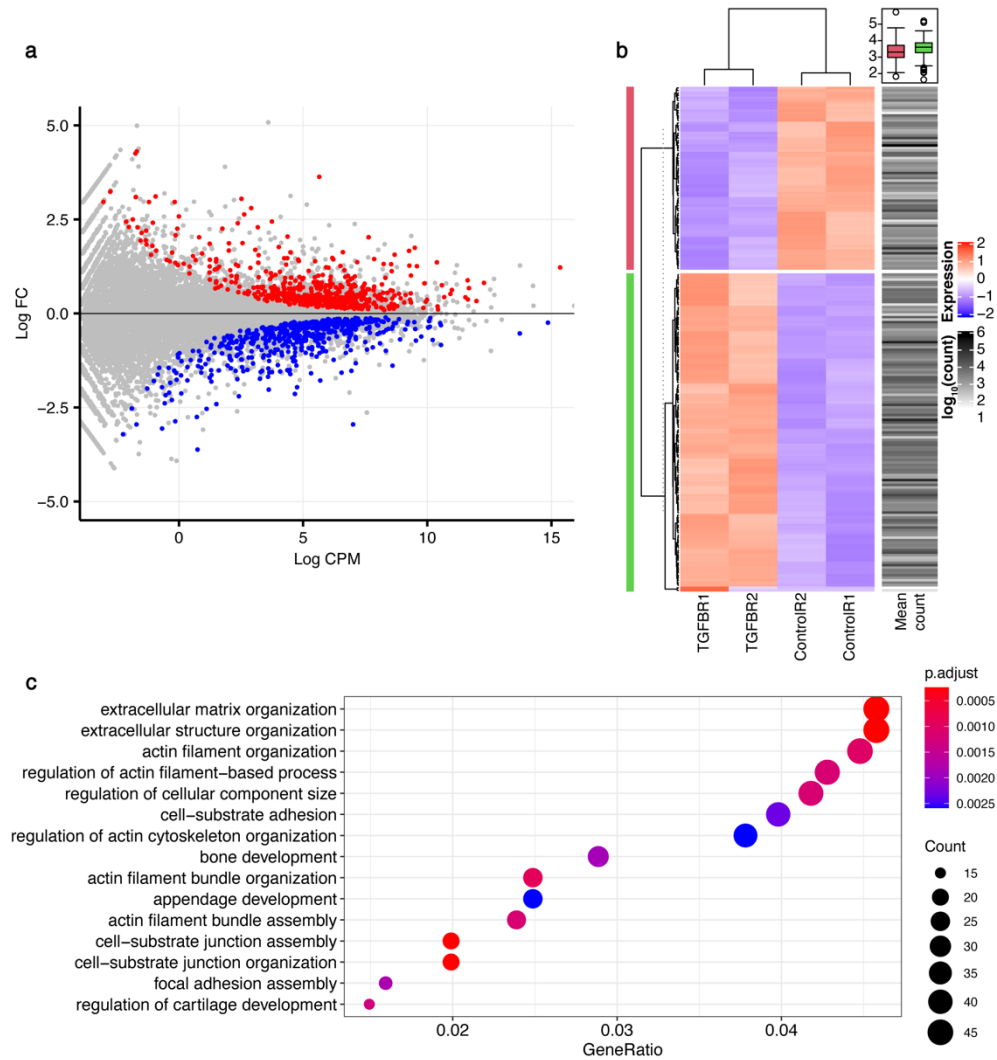

**Fig. S3. Transcriptomic modifications induced by TGF- $\beta$  treatment.** (a) MD plot reveals the log fold change and average abundance of each gene, with significantly differentially expressed (FDR < 0.05) genes shown in red (upregulated) and blue (downregulated). (b) Heatmap showing relative expression and abundance of the top 200 differentially expressed genes. Color from blue to red corresponds to the relative expression levels, while the intensity of the mean count column indicates the average abundance of the gene. (c) Dot plot of gene ontology (GO) analysis of differentially expressed genes in TGF- $\beta$  treated fibroblasts plotted against gene ratio. Color indicates the p-value of the pathway and dot size corresponds to the number of DEGs in each pathway.

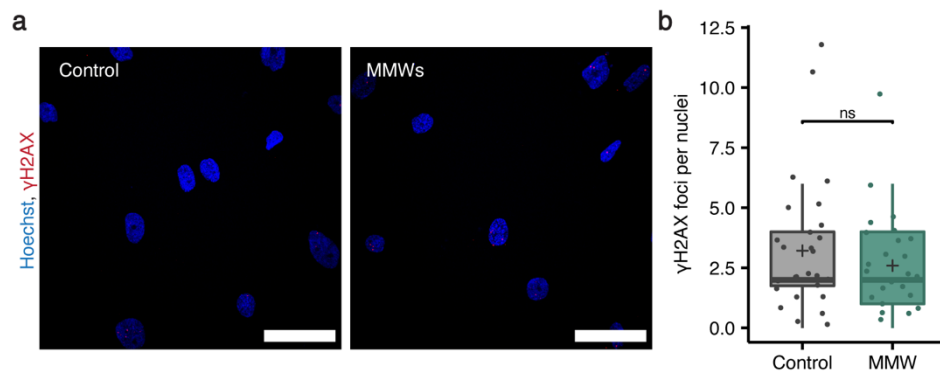

**Fig. S4. MMWs do not induce DNA damage.** (a) Representative confocal images of nuclei stained with a  $\gamma$ H2AX specific antibody (red:  $\gamma$ H2AX, blue: nuclei, Hoechst 34580; magnification: 60x; numerical aperture: 1.4; scale bar: 50  $\mu$ m). (b) Number of  $\gamma$ H2AX foci per nucleus ( $n \geq 25$  nuclei per condition). The thick center line represents the median and the black cross the mean for each sample.

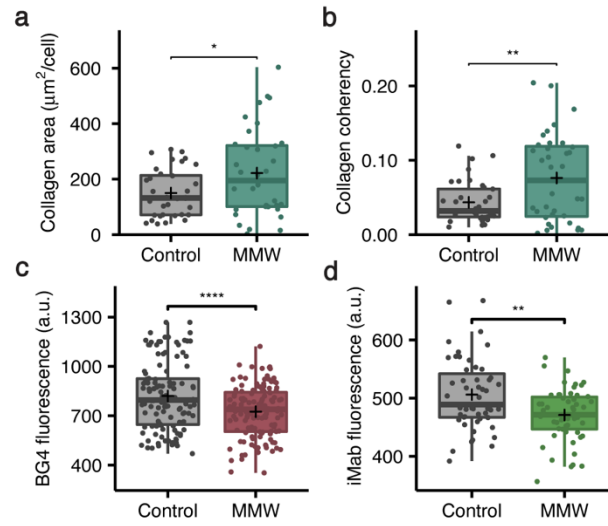

**Fig. S5. Alternative box plot data representations showing individual datapoints.** For (a) Fig. 1b, (b) Fig. 1c, (c) Fig. 4c and (d) Fig. 4d. Data has been represented as box plots in which the black cross represents the mean, the thick center line is the median and the lower and upper horizontal lines of the box are the first and third quartiles, respectively. The upper whisker extends from the hinge to the largest value no further than  $1.5 \times$  the interquartile range (IQR) from the third quartile and the lower to the smallest value at most  $1.5 \times$  IQR of the first quartile.

## SUPPLEMENTAL TABLES

**Table S1. Genes associated with heat shock proteins or heat shock related biological pathways.**

| Gene id         | Symbol  | FDR         | logPostFC | Control mean count | MMW mean count |
|-----------------|---------|-------------|-----------|--------------------|----------------|
| ENSG00000109971 | HSPA8   | 0           | -0.115    | 49659.08           | 45841.63       |
| ENSG00000110713 | NUP98   | 0.078390894 | -0.125    | 5618.32            | 5152.60        |
| ENSG00000165280 | VCP     | 0.311349344 | -0.094    | 20217.03           | 18947.21       |
| ENSG00000167792 | NDUFV1  | 0.547746854 | -0.171    | 3751.24            | 3332.13        |
| ENSG00000119013 | NDUFB3  | 0.57066261  | -0.270    | 1000.52            | 829.40         |
| ENSG00000140740 | UQCRC2  | 0.74478869  | -0.163    | 3306.95            | 2952.62        |
| ENSG00000140990 | NDUFB10 | 0.748339055 | -0.148    | 2014.82            | 1818.32        |
| ENSG00000126267 | COX6B1  | 0.824132616 | -0.145    | 2372.89            | 2146.33        |
| ENSG00000110717 | NDUFS8  | 0.857985258 | -0.153    | 1531.25            | 1377.00        |
| ENSG00000117748 | RPA2    | 0.873687454 | -0.209    | 945.38             | 817.74         |
| ENSG00000175054 | ATR     | 0.890916474 | 0.158     | 1649.56            | 1840.96        |
| ENSG00000115520 | COQ10B  | 0.895505769 | 0.285     | 1632.35            | 1989.07        |
| ENSG00000198840 | MT-ND3  | 0.906659025 | 1.075     | 60.02              | 127.42         |
| ENSG00000069248 | NUP133  | 0.908674662 | -0.117    | 2728.80            | 2516.19        |
| ENSG00000155561 | NUP205  | 0.951137951 | -0.124    | 2227.89            | 2044.07        |
| ENSG00000132622 | HSPA12B | 0.95875332  | 1.060     | 5.79               | 13.00          |
| ENSG00000149311 | ATM     | 0.961571802 | 0.121     | 5210.34            | 5667.95        |
| ENSG00000128609 | NDUFA5  | 0.963298306 | 0.289     | 933.48             | 1140.82        |
| ENSG00000004478 | FKBP4   | 0.964354311 | -0.202    | 1645.13            | 1429.91        |
| ENSG00000198793 | MTOR    | 0.969265482 | -0.095    | 3784.70            | 3544.13        |
| ENSG00000178449 | COX14   | 0.971836844 | 0.308     | 523.78             | 648.45         |
| ENSG00000204388 | HSPA1B  | 0.972973939 | 0.231     | 7.83               | 9.34           |
| ENSG00000198695 | MT-ND6  | 0.973695104 | 0.633     | 13.79              | 21.87          |
| ENSG00000203667 | COX20   | 0.975163982 | -0.386    | 656.04             | 501.98         |
| ENSG00000170906 | NDUFA3  | 0.975389632 | -0.334    | 500.70             | 397.04         |
| ENSG00000151366 | NDUFC2  | 0.975765613 | 0.380     | 351.12             | 457.03         |
| ENSG00000073578 | SDHA    | 0.976407747 | -0.258    | 453.78             | 379.28         |
| ENSG00000105379 | ETFB    | 0.980305746 | -0.199    | 561.16             | 488.76         |
| ENSG00000163626 | COX18   | 0.980404378 | 0.223     | 535.60             | 625.45         |
| ENSG00000156735 | BAG4    | 0.980512772 | 0.139     | 1037.89            | 1142.67        |
| ENSG00000204389 | HSPA1A  | 0.983969796 | 0.149     | 11.20              | 12.52          |
| ENSG00000175567 | UCP2    | 0.984649585 | -0.318    | 35.49              | 28.30          |
| ENSG00000152137 | HSPB8   | 0.985192934 | 0.120     | 1354.31            | 1471.63        |
| ENSG00000102900 | NUP93   | 0.985594175 | -0.200    | 1445.53            | 1258.28        |
| ENSG00000198899 | MT-ATP6 | 0.985882602 | 0.839     | 361.70             | 647.78         |
| ENSG00000058404 | CAMK2B  | 0.985938274 | 0.074     | 33.72              | 35.53          |
| ENSG00000174886 | NDUFA11 | 0.98708747  | -0.235    | 276.56             | 234.84         |
| ENSG00000109390 | NDUFC1  | 0.989193607 | -0.295    | 510.12             | 415.70         |
| ENSG00000167283 | ATP5MG  | 0.989702351 | 0.294     | 404.61             | 496.17         |
| ENSG00000115286 | NDUFS7  | 0.989842033 | -0.197    | 1017.09            | 887.16         |
| ENSG00000125375 | DMAC2L  | 0.989949153 | 0.234     | 133.09             | 156.67         |



| Gene id         | Symbol   | FDR         | logPostFC | Control mean count | MMW mean count |
|-----------------|----------|-------------|-----------|--------------------|----------------|
| ENSG00000094914 | AAAS     | 0.99106578  | -0.246    | 1050.70            | 886.08         |
| ENSG00000105993 | DNAJB6   | 0.991568635 | 0.099     | 2672.44            | 2862.15        |
| ENSG00000127540 | UQCR11   | 0.991861106 | 0.204     | 320.36             | 369.20         |
| ENSG00000112208 | BAG2     | 0.992432171 | 0.245     | 1608.57            | 1906.05        |
| ENSG00000177646 | ACAD9    | 0.993122278 | -0.124    | 1429.00            | 1311.23        |
| ENSG00000168259 | DNAJC7   | 0.993491562 | -0.112    | 1874.58            | 1734.75        |
| ENSG00000108559 | NUP88    | 0.993799929 | -0.114    | 986.33             | 911.48         |
| ENSG00000145494 | NDUFS6   | 0.994077236 | -0.144    | 434.80             | 393.46         |
| ENSG00000153291 | SLC25A27 | 0.994119187 | -0.013    | 145.20             | 143.88         |
| ENSG00000082701 | GSK3B    | 0.994157369 | 0.190     | 4032.31            | 4600.01        |
| ENSG00000173660 | UQCRH    | 0.994187639 | -0.176    | 2860.38            | 2532.00        |
| ENSG00000137806 | NDUFAF1  | 0.994300542 | -0.194    | 596.94             | 521.71         |
| ENSG00000105821 | DNAJC2   | 0.994530974 | -0.132    | 435.08             | 397.05         |
| ENSG00000164919 | COX6C    | 0.994705019 | -0.089    | 2318.36            | 2179.83        |
| ENSG00000148660 | CAMK2G   | 0.994830144 | -0.134    | 2267.57            | 2065.80        |
| ENSG00000136243 | NUP42    | 0.994836113 | 0.133     | 458.36             | 502.63         |
| ENSG00000117118 | SDHB     | 0.994857937 | -0.095    | 2008.94            | 1881.48        |
| ENSG00000139496 | NUP58    | 0.994977107 | -0.112    | 1892.14            | 1750.59        |
| ENSG00000058804 | NDC1     | 0.995018965 | -0.173    | 806.04             | 715.06         |
| ENSG00000111581 | NUP107   | 0.995029019 | -0.113    | 1074.59            | 993.30         |
| ENSG00000164405 | UQCRQ    | 0.995238987 | -0.085    | 2193.29            | 2068.34        |
| ENSG00000198763 | MT-ND2   | 0.99526816  | 0.604     | 252.18             | 383.69         |
| ENSG00000151929 | BAG3     | 0.995360404 | 0.121     | 1616.48            | 1757.77        |
| ENSG00000136463 | TACO1    | 0.995403917 | -0.102    | 580.65             | 541.12         |
| ENSG00000178741 | COX5A    | 0.995493827 | 0.123     | 901.47             | 981.53         |
| ENSG00000241468 | ATP5MF   | 0.995541112 | -0.128    | 776.51             | 710.63         |
| ENSG00000164182 | NDUFAF2  | 0.995595362 | -0.035    | 406.89             | 397.24         |
| ENSG00000166260 | COX11    | 0.995887683 | -0.092    | 902.48             | 846.83         |
| ENSG00000093000 | NUP50    | 0.995959626 | -0.095    | 2257.94            | 2113.59        |
| ENSG00000167965 | MLST8    | 0.995968228 | -0.127    | 1126.22            | 1031.53        |
| ENSG00000003509 | NDUFAF7  | 0.995997035 | 0.082     | 614.80             | 650.61         |
| ENSG00000119421 | NDUFA8   | 0.996017667 | -0.053    | 533.23             | 513.94         |
| ENSG00000153201 | RANBP2   | 0.996129355 | 0.108     | 8709.82            | 9384.88        |
| ENSG00000187051 | RPS19BP1 | 0.996195276 | -0.101    | 1977.29            | 1843.30        |
| ENSG00000102078 | SLC25A14 | 0.99625821  | -0.098    | 264.72             | 247.28         |
| ENSG00000099624 | ATP5F1D  | 0.996327604 | -0.001    | 509.00             | 508.65         |
| ENSG00000213024 | NUP62    | 0.996333408 | -0.136    | 1375.99            | 1251.93        |
| ENSG00000198888 | MT-ND1   | 0.99642338  | 0.499     | 532.40             | 752.63         |
| ENSG00000004779 | NDUFAB1  | 0.996515465 | -0.078    | 962.76             | 911.75         |
| ENSG00000075188 | NUP37    | 0.996529842 | -0.035    | 673.54             | 657.54         |
| ENSG00000101146 | RAE1     | 0.996707112 | 0.073     | 1028.99            | 1082.55        |
| ENSG00000165264 | NDUFB6   | 0.996756239 | -0.052    | 843.61             | 813.98         |
| ENSG00000169020 | ATP5ME   | 0.996831541 | 0.070     | 1259.23            | 1322.28        |
| ENSG00000183648 | NDUFB1   | 0.996897139 | 0.064     | 953.56             | 997.09         |

| Gene id         | Symbol   | FDR         | logPostFC | Control mean count | MMW mean count |
|-----------------|----------|-------------|-----------|--------------------|----------------|
| ENSG00000096384 | HSP90AB1 | 0.996900445 | -0.160    | 27490.55           | 24606.49       |
| ENSG00000171503 | ETFDH    | 0.996925011 | -0.035    | 851.40             | 831.24         |
| ENSG00000284194 | SCO2     | 0.996931987 | 0.022     | 830.17             | 843.22         |
| ENSG00000130159 | ECSIT    | 0.996956528 | -0.014    | 811.61             | 803.91         |
| ENSG00000126803 | HSPA2    | 0.997042945 | 0.084     | 660.21             | 699.66         |
| ENSG00000145349 | CAMK2D   | 0.997054956 | 0.099     | 5749.77            | 6157.52        |
| ENSG00000101247 | NDUFAF5  | 0.997058738 | -0.054    | 394.48             | 379.96         |
| ENSG00000143252 | SDHC     | 0.997081022 | -0.056    | 1157.35            | 1113.07        |
| ENSG00000109846 | CRYAB    | 0.997118279 | -0.092    | 1752.91            | 1644.53        |
| ENSG00000184752 | NDUFA12  | 0.997145886 | -0.003    | 728.54             | 726.81         |
| ENSG00000120253 | NUP43    | 0.997265722 | -0.052    | 1372.06            | 1323.34        |
| ENSG00000158864 | NDUFS2   | 0.997274833 | -0.109    | 1725.04            | 1599.13        |
| ENSG00000196313 | POM121   | 0.997283142 | -0.009    | 1048.55            | 1041.85        |
| ENSG00000096717 | SIRT1    | 0.99728329  | 0.071     | 1277.09            | 1341.55        |
| ENSG00000213619 | NDUFS3   | 0.997313088 | -0.034    | 1112.12            | 1085.95        |
| ENSG00000102882 | MAPK3    | 0.997319406 | -0.007    | 1047.12            | 1042.29        |
| ENSG00000167863 | ATP5PD   | 0.99735456  | -0.106    | 3342.93            | 3106.09        |
| ENSG00000138750 | NUP54    | 0.997364432 | -0.035    | 1186.73            | 1158.53        |
| ENSG00000085415 | SEH1L    | 0.99738342  | 0.024     | 1059.42            | 1077.04        |
| ENSG00000148290 | SURF1    | 0.997386282 | 0.027     | 639.01             | 651.22         |
| ENSG00000115944 | COX7A2L  | 0.997393628 | 0.085     | 2553.51            | 2709.24        |
| ENSG00000176340 | COX8A    | 0.997397507 | 0.062     | 1124.82            | 1173.97        |
| ENSG00000135390 | ATP5MC2  | 0.997421912 | -0.097    | 2334.30            | 2182.24        |
| ENSG00000010256 | UQCRC1   | 0.997516925 | -0.161    | 4223.72            | 3778.58        |
| ENSG00000154518 | ATP5MC3  | 0.997564535 | -0.124    | 2356.25            | 2161.76        |
| ENSG00000198786 | MT-ND5   | 0.997577568 | 0.489     | 890.35             | 1249.78        |
| ENSG00000131174 | COX7B    | 0.997628669 | 0.006     | 1310.48            | 1315.66        |
| ENSG00000171204 | TMEM126B | 0.997636883 | 0.025     | 1003.87            | 1021.25        |
| ENSG00000187522 | HSPA14   | 0.997674394 | 0.010     | 466.17             | 469.54         |
| ENSG00000136521 | NDUFB5   | 0.997692045 | 0.021     | 1461.79            | 1483.70        |
| ENSG00000168653 | NDUFS5   | 0.997704919 | -0.094    | 2564.01            | 2402.44        |
| ENSG00000165868 | HSPA12A  | 0.997724261 | 0.189     | 1298.71            | 1481.03        |
| ENSG00000005339 | CREBBP   | 0.997731666 | 0.222     | 3266.59            | 3810.72        |
| ENSG00000169021 | UQCRC1   | 0.99775122  | -0.069    | 2187.05            | 2084.15        |
| ENSG00000158941 | CCAR2    | 0.997752266 | -0.063    | 2060.07            | 1971.59        |
| ENSG00000156467 | UQCRB    | 0.997756578 | 0.100     | 3480.67            | 3729.86        |
| ENSG00000125356 | NDUFA1   | 0.997791504 | 0.065     | 1524.89            | 1595.42        |
| ENSG00000099795 | NDUFB7   | 0.997824185 | -0.042    | 1546.83            | 1502.25        |
| ENSG00000132383 | RPA1     | 0.997832078 | 0.041     | 1792.98            | 1844.84        |
| ENSG00000189043 | NDUFA4   | 0.997849917 | -0.088    | 2568.81            | 2417.03        |
| ENSG00000130414 | NDUFA10  | 0.997870041 | -0.068    | 2280.20            | 2174.65        |
| ENSG00000159199 | ATP5MC1  | 0.997882219 | -0.038    | 605.79             | 590.21         |
| ENSG00000113569 | NUP155   | 0.997916482 | 0.013     | 1595.50            | 1610.35        |
| ENSG00000141564 | RPTOR    | 0.997929708 | 0.011     | 1822.42            | 1835.87        |

| Gene id         | Symbol   | FDR         | logPostFC | Control mean count | MMW mean count |
|-----------------|----------|-------------|-----------|--------------------|----------------|
| ENSG00000065518 | NDUFB4   | 0.997935496 | 0.002     | 1476.24            | 1477.98        |
| ENSG00000116459 | ATP5PB   | 0.998004067 | -0.053    | 4164.99            | 4015.54        |
| ENSG00000126602 | TRAP1    | 0.998021319 | -0.012    | 1198.59            | 1188.49        |
| ENSG00000131495 | NDUFA2   | 0.998098608 | 0.004     | 824.41             | 826.94         |
| ENSG00000095319 | NUP188   | 0.99814162  | 0.037     | 2519.57            | 2584.16        |
| ENSG00000030066 | NUP160   | 0.998196526 | 0.065     | 2495.57            | 2611.50        |
| ENSG00000127184 | COX7C    | 0.998250528 | -0.034    | 2207.04            | 2154.97        |
| ENSG00000126883 | NUP214   | 0.998277878 | -0.013    | 1359.96            | 1347.45        |
| ENSG00000165629 | ATP5F1C  | 0.998278622 | -0.058    | 2960.70            | 2843.66        |
| ENSG00000172115 | CYCS     | 0.998305891 | 0.021     | 1870.50            | 1898.59        |
| ENSG00000185122 | HSF1     | 0.998314065 | -0.021    | 2241.81            | 2209.69        |
| ENSG00000135940 | COX5B    | 0.998343295 | -0.064    | 2700.50            | 2583.58        |
| ENSG00000106399 | RPA3     | 0.998352696 | 0.014     | 400.05             | 403.99         |
| ENSG00000125450 | NUP85    | 0.99837282  | -0.060    | 749.17             | 718.66         |
| ENSG00000198886 | MT-ND4   | 0.99837887  | 0.500     | 1209.48            | 1710.92        |
| ENSG00000155304 | HSPA13   | 0.998386353 | -0.002    | 2758.40            | 2753.76        |
| ENSG00000113845 | TIMMDC1  | 0.998387211 | -0.020    | 2721.37            | 2683.14        |
| ENSG00000164070 | HSPA4L   | 0.998391982 | 0.093     | 1501.23            | 1600.80        |
| ENSG00000157020 | SEC13    | 0.998424364 | 0.081     | 5708.58            | 6036.93        |
| ENSG00000124172 | ATP5F1E  | 0.998460311 | 0.057     | 4717.03            | 4906.45        |
| ENSG00000154723 | ATP5PF   | 0.998591247 | -0.031    | 720.32             | 705.08         |
| ENSG00000132002 | DNAJB1   | 0.998603175 | -0.035    | 3738.33            | 3647.49        |
| ENSG00000110955 | ATP5F1B  | 0.998651113 | -0.096    | 12087.10           | 11307.30       |
| ENSG00000047410 | TPR      | 0.998682971 | -0.035    | 7813.98            | 7625.81        |
| ENSG00000230989 | HSBP1    | 0.998685707 | -0.011    | 3885.65            | 3855.94        |
| ENSG00000131143 | COX4I1   | 0.998699306 | 0.025     | 4435.30            | 4514.30        |
| ENSG00000198727 | MT-CYB   | 0.998723743 | 0.624     | 2099.75            | 3236.05        |
| ENSG00000108953 | YWHAE    | 0.998742752 | 0.008     | 3803.38            | 3825.30        |
| ENSG00000120694 | HSPH1    | 0.998747725 | 0.021     | 4842.78            | 4913.16        |
| ENSG00000110958 | PTGES3   | 0.998795772 | 0.050     | 4018.22            | 4158.76        |
| ENSG00000138095 | LRPPRC   | 0.998854467 | -0.035    | 5732.78            | 5596.21        |
| ENSG00000162889 | MAPKAPK2 | 0.998907017 | 0.010     | 5381.69            | 5420.19        |
| ENSG00000100393 | EP300    | 0.998907852 | 0.083     | 4540.42            | 4810.32        |
| ENSG00000170606 | HSPA4    | 0.998983166 | -0.005    | 7587.41            | 7560.17        |
| ENSG00000100030 | MAPK1    | 0.999057258 | 0.018     | 8856.68            | 8968.16        |
| ENSG00000156170 | NDUFAF6  | 0.999063885 | 0.034     | 211.49             | 216.51         |
| ENSG00000198712 | MT-CO2   | 0.999147878 | 0.312     | 3753.89            | 4660.56        |
| ENSG00000100380 | ST13     | 0.999151691 | -0.033    | 10494.54           | 10254.76       |
| ENSG00000044574 | HSPA5    | 0.999163307 | 0.030     | 5907.08            | 6031.28        |
| ENSG00000184076 | UQCR10   | 0.999259615 | 0.004     | 945.66             | 948.57         |
| ENSG00000147684 | NDUFB9   | 0.999287523 | 0.014     | 1501.76            | 1515.98        |
| ENSG00000113013 | HSPA9    | 0.999324165 | -0.074    | 10470.84           | 9948.63        |
| ENSG00000152234 | ATP5F1A  | 0.999328786 | -0.090    | 14995.00           | 14084.78       |
| ENSG00000094631 | HDAC6    | 0.99933103  | -0.011    | 1640.86            | 1628.23        |

| Gene id         | Symbol   | FDR         | logPostFC | Control mean count | MMW mean count |
|-----------------|----------|-------------|-----------|--------------------|----------------|
| ENSG00000080824 | HSP90AA1 | 0.999456066 | 0.004     | 12592.12           | 12629.45       |
| ENSG00000198938 | MT-CO3   | 0.999673494 | -0.022    | 17908.36           | 17631.49       |
| ENSG00000198804 | MT-CO1   | 0.999849043 | 0.186     | 48109.61           | 54730.29       |
| ENSG00000178057 | NDUFAF3  | 0.999868567 | -0.085    | 1092.96            | 1030.61        |
| ENSG00000204370 | SDHD     | 0.999870329 | -0.021    | 1314.52            | 1295.47        |
| ENSG00000156508 | EEF1A1   | 0.999932361 | -0.031    | 348293.25          | 340948.01      |
| ENSG00000179091 | CYC1     | 0.999999998 | -0.244    | 1933.38            | 1632.78        |
| ENSG00000166170 | BAG5     | 0.999999999 | 0.221     | 1958.41            | 2283.32        |
| ENSG00000204673 | AKT1S1   | 1           | 0.291     | 853.54             | 1044.39        |
| ENSG00000090266 | NDUFB2   | 1           | -0.182    | 1501.61            | 1323.21        |
| ENSG00000070808 | CAMK2A   | 1           | -0.940    | 51.28              | 26.31          |
| ENSG00000111775 | COX6A1   | 1           | -0.184    | 1063.48            | 935.85         |
| ENSG00000124789 | NUP153   | 1           | 0.106     | 2443.65            | 2630.28        |
| ENSG00000163002 | NUP35    | 1           | 0.298     | 179.79             | 221.19         |
| ENSG00000107262 | BAG1     | 1           | -0.093    | 1921.36            | 1801.96        |
| ENSG00000149196 | HIKESHI  | 1           | 0.089     | 904.30             | 961.72         |
| ENSG00000173110 | HSPA6    | 1           | -0.061    | 25.80              | 24.71          |
| ENSG00000139180 | NDUFA9   | 1           | -0.249    | 301.15             | 253.35         |
| ENSG00000186010 | NDUFA13  | 1           | 0.154     | 23.04              | 25.74          |
| ENSG00000241837 | ATP5PO   | 1           | 0.064     | 366.59             | 383.25         |
| ENSG00000178127 | NDUFV2   | 1           | 0.193     | 61.76              | 70.71          |
| ENSG00000123545 | NDUFAF4  | 1           | 0.103     | 285.87             | 307.00         |
| ENSG00000164258 | NDUFS4   | 1           | -0.074    | 1282.11            | 1218.35        |
| ENSG00000147123 | NDUFB11  | 1           | -0.053    | 1864.12            | 1796.56        |
| ENSG00000023228 | NDUFS1   | 1           | -0.075    | 5794.76            | 5500.22        |
| ENSG00000166136 | NDUFB8   | 1           | -0.023    | 212.17             | 208.76         |
| ENSG00000135469 | COQ10A   | 1           | -0.169    | 388.63             | 345.57         |
| ENSG00000133028 | SCO1     | 1           | 0.049     | 1084.28            | 1121.88        |
| ENSG00000133983 | COX16    | 1           | 0.481     | 37.29              | 52.39          |
| ENSG00000140374 | ETFA     | 1           | -0.045    | 2046.17            | 1983.32        |
| ENSG00000151413 | NUBPL    | 1           | -0.001    | 315.91             | 315.58         |
| ENSG00000160194 | NDUFV3   | 1           | -0.061    | 1213.34            | 1162.75        |
| ENSG00000175564 | UCP3     | 1           | 0.380     | 29.16              | 38.20          |
| ENSG00000184983 | NDUFA6   | 1           | -0.144    | 1070.84            | 968.97         |

**Table S2. Pathway analysis of the top 20 DEGs, filtered for pathways involving  $\geq 3$  DEGs.**

| <b>Pathway ID</b> | <b>Pathway description</b>                        | <b>Gene IDs</b>                | <b>Genes</b> |
|-------------------|---------------------------------------------------|--------------------------------|--------------|
| GO:0005925        | focal adhesion                                    | HSPA8/LPXN/AKAP12/ITGAV/SCARB2 | 5            |
| GO:0030055        | cell-substrate junction                           | HSPA8/LPXN/AKAP12/ITGAV/SCARB2 | 5            |
| GO:0043254        | regulation of protein-containing complex assembly | HSPA8/CAMSAP2/JMY/DDX3X        | 4            |
| GO:0007050        | cell cycle arrest                                 | IRF1/PLK2/JMY                  | 3            |
| GO:0072331        | signal transduction by p53 class mediator         | TWIST1/PLK2/JMY                | 3            |
| GO:0050663        | cytokine secretion                                | TWIST1/AKAP12/ITGAV            | 3            |
| GO:0007059        | chromosome segregation                            | NCAPD2/SMC2/DDX3X              | 3            |
| GO:0071214        | cellular response to abiotic stimulus             | GPR68/IRF1/DDX3X               | 3            |
| GO:0104004        | cellular response to environmental stimulus       | GPR68/IRF1/DDX3X               | 3            |
| GO:1902903        | regulation of supramolecular fiber organization   | HSPA8/CAMSAP2/JMY              | 3            |
| GO:0071103        | DNA conformation change                           | NCAPD2/SMC2/DDX3X              | 3            |
| GO:0019058        | viral life cycle                                  | ITGAV/SCARB2/DDX3X             | 3            |
| GO:0006605        | protein targeting                                 | HSPA8/AKAP12/SCARB2            | 3            |
| GO:0001667        | ameboidal-type cell migration                     | TWIST1/AKAP12/PLK2             | 3            |

**Table S3. Differentially expressed genes in MMW-exposed primary human fibroblasts.**

| Gene id         | Symbol    | FDR      | logPostFC | Control mean count | MMW mean count |
|-----------------|-----------|----------|-----------|--------------------|----------------|
| ENSG0000010292  | NCAPD2    | 0        | -0.417    | 3288.80            | 2462.42        |
| ENSG00000091527 | CDV3      | 0        | 0.234     | 7362.70            | 8660.31        |
| ENSG00000109971 | HSPA8     | 0        | -0.115    | 49659.08           | 45841.63       |
| ENSG00000110031 | LPXN      | 0        | -0.304    | 4245.03            | 3437.78        |
| ENSG00000119714 | GPR68     | 0        | -0.387    | 2908.61            | 2223.68        |
| ENSG00000125347 | IRF1      | 0        | 0.484     | 3083.19            | 4312.13        |
| ENSG00000131016 | AKAP12    | 0        | 0.401     | 4998.72            | 6601.11        |
| ENSG00000136824 | SMC2      | 0        | -0.510    | 1662.34            | 1167.25        |
| ENSG00000138760 | SCARB2    | 0        | 0.126     | 15368.47           | 16774.13       |
| ENSG00000169504 | CLIC4     | 0        | 0.205     | 21766.00           | 25091.46       |
| ENSG00000118200 | CAMSAP2   | 2.22E-16 | 0.232     | 3697.84            | 4342.38        |
| ENSG00000145632 | PLK2      | 6.66E-16 | 0.345     | 3878.59            | 4928.15        |
| ENSG00000122691 | TWIST1    | 1.67E-15 | 0.268     | 2889.26            | 3478.10        |
| ENSG00000152409 | JMY       | 2.00E-15 | 0.316     | 2558.20            | 3185.48        |
| ENSG00000177156 | TALDO1    | 8.66E-15 | -0.211    | 6267.15            | 5415.82        |
| ENSG00000154930 | ACSS1     | 3.20E-14 | 0.863     | 178.80             | 325.91         |
| ENSG00000182463 | TSHZ2     | 3.61E-14 | 0.265     | 2578.63            | 3098.04        |
| ENSG00000138448 | ITGAV     | 7.33E-14 | 0.171     | 13802.65           | 15536.32       |
| ENSG00000215301 | DDX3X     | 8.74E-14 | 0.250     | 16816.80           | 19999.95       |
| ENSG00000099251 | HSD17B7P2 | 1.50E-12 | -1.256    | 187.92             | 78.16          |
| ENSG00000163412 | EIF4E3    | 7.82E-12 | 0.633     | 447.09             | 693.79         |
| ENSG00000081154 | PCNP      | 2.02E-11 | 0.208     | 3358.23            | 3880.51        |
| ENSG00000108551 | RASD1     | 3.35E-11 | -0.601    | 536.96             | 353.80         |
| ENSG00000122705 | CLTA      | 3.35E-11 | -0.159    | 6834.21            | 6119.40        |
| ENSG00000101003 | GINS1     | 5.34E-11 | -1.050    | 189.06             | 90.85          |
| ENSG00000189184 | PCDH18    | 7.20E-11 | 0.224     | 23200.85           | 27089.28       |
| ENSG00000127329 | PTPRB     | 8.03E-11 | 0.445     | 1216.72            | 1656.80        |
| ENSG00000177425 | PAWR      | 1.38E-10 | 0.515     | 879.24             | 1257.17        |
| ENSG00000182670 | TTC3      | 2.38E-10 | 0.232     | 16888.95           | 19839.67       |
| ENSG00000205189 | ZBTB10    | 3.34E-10 | 0.361     | 1194.80            | 1534.88        |
| ENSG00000180596 | H2BC4     | 5.61E-10 | -0.485    | 3434.56            | 2454.06        |
| ENSG00000122591 | FAM126A   | 6.08E-10 | 0.256     | 5496.74            | 6562.82        |
| ENSG00000130962 | PRRG1     | 1.56E-09 | 0.520     | 414.30             | 594.31         |
| ENSG00000042753 | AP2S1     | 2.40E-09 | -0.247    | 3073.56            | 2589.35        |
| ENSG00000073111 | MCM2      | 3.28E-09 | -0.461    | 1298.47            | 943.35         |
| ENSG00000165475 | CRYL1     | 5.14E-09 | -0.661    | 401.06             | 253.25         |
| ENSG00000174839 | DENND6A   | 5.41E-09 | 0.426     | 794.29             | 1067.41        |
| ENSG00000047644 | WWC3      | 7.56E-09 | 0.203     | 2982.08            | 3432.01        |
| ENSG00000122068 | FYTTD1    | 1.93E-08 | 0.198     | 3008.58            | 3450.63        |
| ENSG00000178996 | SNX18     | 5.19E-08 | 0.254     | 4621.49            | 5511.92        |
| ENSG00000171720 | HDAC3     | 7.89E-08 | -0.280    | 1838.38            | 1514.27        |
| ENSG00000127586 | CHTF18    | 1.02E-07 | -0.661    | 325.95             | 205.84         |
| ENSG00000161888 | SPC24     | 1.07E-07 | -1.055    | 406.49             | 195.14         |

| Gene id         | Symbol   | FDR      | logPostFC | Control mean count | MMW mean count |
|-----------------|----------|----------|-----------|--------------------|----------------|
| ENSG00000211451 | GNRHR2   | 1.12E-07 | -3.022    | 31.90              | 3.17           |
| ENSG00000196968 | FUT11    | 2.62E-07 | 0.295     | 1848.69            | 2267.77        |
| ENSG00000170962 | PDGFD    | 2.68E-07 | 0.442     | 1319.41            | 1793.27        |
| ENSG00000049541 | RFC2     | 3.44E-07 | -0.768    | 591.26             | 346.77         |
| ENSG00000108518 | PFN1     | 3.81E-07 | -0.320    | 9445.39            | 7568.76        |
| ENSG00000280383 |          | 3.93E-07 | 1.475     | 27.58              | 78.20          |
| ENSG00000163946 | TASOR    | 3.94E-07 | 0.212     | 3512.26            | 4067.93        |
| ENSG00000120068 | HOXB8    | 5.45E-07 | -1.382    | 127.26             | 48.29          |
| ENSG00000170779 | CDCA4    | 7.01E-07 | -0.481    | 569.71             | 407.98         |
| ENSG00000198265 | HELZ     | 7.18E-07 | 0.252     | 2664.48            | 3172.61        |
| ENSG00000113240 | CLK4     | 7.51E-07 | -0.576    | 456.26             | 305.85         |
| ENSG00000169967 | MAP3K2   | 9.11E-07 | 0.180     | 3608.22            | 4086.97        |
| ENSG00000161011 | SQSTM1   | 1.00E-06 | -0.248    | 66821.95           | 56270.69       |
| ENSG00000182154 | MRPL41   | 1.08E-06 | -0.399    | 1266.18            | 960.15         |
| ENSG00000137309 | HMGA1    | 3.09E-06 | -0.429    | 10018.99           | 7440.27        |
| ENSG00000013275 | PSMC4    | 3.23E-06 | -0.273    | 2383.21            | 1972.59        |
| ENSG00000138688 | KIAA1109 | 3.25E-06 | 0.211     | 10232.82           | 11846.89       |
| ENSG00000133997 | MED6     | 3.48E-06 | 0.486     | 479.85             | 672.51         |
| ENSG00000279861 |          | 4.21E-06 | 1.898     | 13.13              | 51.31          |
| ENSG00000146223 | RPL7L1   | 4.24E-06 | -0.200    | 5027.15            | 4376.14        |
| ENSG00000157593 | SLC35B2  | 4.42E-06 | -0.182    | 3556.63            | 3135.76        |
| ENSG00000142230 | SAE1     | 4.43E-06 | -0.199    | 3649.04            | 3179.53        |
| ENSG00000005448 | WDR54    | 4.90E-06 | -0.446    | 577.23             | 423.55         |
| ENSG00000122642 | FKBP9    | 5.18E-06 | 0.100     | 18302.16           | 19621.00       |
| ENSG00000200087 | SNORA73B | 5.59E-06 | 0.669     | 767.89             | 1221.29        |
| ENSG00000121766 | ZCCHC17  | 6.27E-06 | -0.397    | 869.88             | 660.57         |
| ENSG00000143870 | PDIA6    | 7.22E-06 | -0.107    | 10206.75           | 9474.76        |
| ENSG00000120705 | ETF1     | 8.27E-06 | 0.156     | 5770.03            | 6428.13        |
| ENSG00000117114 | ADGRL2   | 8.37E-06 | 0.231     | 2271.95            | 2667.40        |
| ENSG00000172175 | MALT1    | 9.54E-06 | 0.245     | 2096.72            | 2484.69        |
| ENSG00000276410 | H2BC3    | 1.22E-05 | -0.800    | 1237.76            | 710.36         |
| ENSG00000101470 | TNNC2    | 1.25E-05 | -2.163    | 38.52              | 7.93           |
| ENSG00000100629 | CEP128   | 1.28E-05 | -0.878    | 181.72             | 98.46          |
| ENSG00000154380 | ENAH     | 1.32E-05 | 0.203     | 3184.91            | 3666.33        |
| ENSG00000156671 | SAMD8    | 1.77E-05 | 0.183     | 2976.62            | 3379.51        |
| ENSG00000125912 | NCLN     | 1.85E-05 | -0.286    | 2790.36            | 2287.99        |
| ENSG00000172725 | CORO1B   | 1.91E-05 | -0.197    | 5235.44            | 4568.45        |
| ENSG00000276045 | ORAI1    | 2.00E-05 | -0.578    | 465.38             | 311.38         |
| ENSG00000102760 | RGCC     | 2.17E-05 | 0.343     | 703.09             | 892.16         |
| ENSG00000160746 | ANO10    | 3.00E-05 | -0.207    | 2962.26            | 2566.23        |
| ENSG00000274425 |          | 3.50E-05 | -1.259    | 85.61              | 35.27          |
| ENSG00000174371 | EXO1     | 4.19E-05 | -0.766    | 254.48             | 149.24         |
| ENSG00000090889 | KIF4A    | 5.41E-05 | -0.893    | 512.95             | 275.91         |
| ENSG00000182150 | ERCC6L2  | 6.07E-05 | 0.258     | 1358.71            | 1624.62        |

| Gene id         | Symbol    | FDR         | logPostFC | Control mean count | MMW mean count |
|-----------------|-----------|-------------|-----------|--------------------|----------------|
| ENSG00000092853 | CLSPN     | 6.84E-05    | -0.696    | 305.96             | 188.49         |
| ENSG00000142875 | PRKACB    | 6.98E-05    | 0.360     | 1191.38            | 1528.95        |
| ENSG00000197912 | SPG7      | 7.70E-05    | -0.165    | 3521.27            | 3141.08        |
| ENSG00000197614 | MFAP5     | 8.28E-05    | 0.239     | 3331.59            | 3933.12        |
| ENSG00000118495 | PLAGL1    | 8.75E-05    | 0.345     | 800.05             | 1016.35        |
| ENSG00000167910 | CYP7A1    | 0.000100828 | 3.426     | 0.92               | 18.31          |
| ENSG00000166133 | RPUSD2    | 0.000111806 | -0.493    | 401.52             | 285.08         |
| ENSG00000169895 | SYAP1     | 0.000113207 | 0.146     | 4069.65            | 4503.16        |
| ENSG00000144642 | RBMS3     | 0.000126842 | 0.361     | 1737.45            | 2231.08        |
| ENSG00000164597 | COG5      | 0.000133923 | 0.247     | 1494.99            | 1773.99        |
| ENSG00000170456 | DENND5B   | 0.000142058 | 0.328     | 828.55             | 1040.11        |
| ENSG00000047249 | ATP6V1H   | 0.000151709 | -0.193    | 2974.03            | 2602.43        |
| ENSG00000197903 | H2BC12    | 0.000159304 | -0.260    | 3983.51            | 3325.71        |
| ENSG00000144566 | RAB5A     | 0.00016299  | 0.238     | 2183.34            | 2575.18        |
| ENSG00000112851 | ERBIN     | 0.000171752 | 0.220     | 6700.66            | 7805.14        |
| ENSG00000114388 | NPRL2     | 0.00018736  | -0.420    | 555.66             | 415.01         |
| ENSG00000144655 | CSRNP1    | 0.000188339 | 0.295     | 2030.87            | 2491.95        |
| ENSG00000178761 | FAM219B   | 0.000219051 | -0.209    | 3073.89            | 2658.46        |
| ENSG00000123975 | CKS2      | 0.000262376 | -0.731    | 726.24             | 437.19         |
| ENSG00000119333 | DYNC2I2   | 0.000273457 | -0.392    | 1655.13            | 1261.50        |
| ENSG00000007944 | MYLIP     | 0.00027487  | 0.454     | 1590.59            | 2178.47        |
| ENSG00000056972 | TRAF3IP2  | 0.000275467 | -0.235    | 2460.71            | 2091.22        |
| ENSG00000180573 | H2AC6     | 0.000286136 | -0.288    | 5108.88            | 4185.57        |
| ENSG00000234456 | MAGI2-AS3 | 0.000327226 | 0.341     | 1197.49            | 1517.14        |
| ENSG00000188486 | H2AX      | 0.000331385 | -0.605    | 672.70             | 441.98         |
| ENSG00000156970 | BUB1B     | 0.000350277 | -0.841    | 401.85             | 223.96         |
| ENSG00000197780 | TAF13     | 0.000352821 | 0.313     | 769.58             | 956.00         |
| ENSG00000133110 | POSTN     | 0.000371437 | 0.292     | 8641.29            | 10582.35       |
| ENSG00000116161 | CACYBP    | 0.000375846 | -0.203    | 2307.38            | 2004.73        |
| ENSG00000159592 | GPBP1L1   | 0.000408739 | -0.186    | 3403.06            | 2990.56        |
| ENSG00000177707 | NECTIN3   | 0.000423824 | 0.276     | 2430.04            | 2941.69        |
| ENSG00000126903 | SLC10A3   | 0.000448676 | -0.358    | 1233.16            | 962.14         |
| ENSG00000182934 | SRPRA     | 0.000495004 | -0.149    | 4956.36            | 4469.81        |
| ENSG00000090316 | MAEA      | 0.00053258  | -0.193    | 2288.70            | 2001.36        |
| ENSG00000277459 |           | 0.0005702   | -3.647    | 16.60              | 0.53           |
| ENSG00000123636 | BAZ2B     | 0.000579858 | 0.222     | 1543.52            | 1800.94        |
| ENSG00000144228 | SPOPL     | 0.000580772 | 0.320     | 665.49             | 830.94         |
| ENSG00000059769 | DNAJC25   | 0.000599904 | 0.515     | 335.73             | 479.97         |
| ENSG00000169223 | LMAN2     | 0.000610514 | -0.227    | 4643.74            | 3966.36        |
| ENSG00000165494 | PCF11     | 0.000614516 | 0.206     | 2236.68            | 2579.23        |
| ENSG00000239713 | APOBEC3G  | 0.000624341 | -1.049    | 265.03             | 127.67         |
| ENSG00000102362 | SYTL4     | 0.000842532 | -0.597    | 252.03             | 166.35         |
| ENSG00000231530 |           | 0.000845385 | 3.408     | 0.94               | 18.31          |
| ENSG00000166257 | SCN3B     | 0.000919342 | 2.132     | 6.97               | 33.49          |



| Gene id         | Symbol      | FDR         | logPostFC | Control mean count | MMW mean count |
|-----------------|-------------|-------------|-----------|--------------------|----------------|
| ENSG00000167671 | UBXN6       | 0.001065278 | -0.199    | 5384.27            | 4691.41        |
| ENSG00000204237 | OXLD1       | 0.001189631 | -0.368    | 607.55             | 470.59         |
| ENSG00000138433 | CIR1        | 0.001224937 | 0.464     | 406.32             | 560.70         |
| ENSG00000249492 |             | 0.001276692 | -3.220    | 17.06              | 1.06           |
| ENSG00000107968 | MAP3K8      | 0.001441755 | 0.392     | 802.73             | 1053.90        |
| ENSG00000127914 | AKAP9       | 0.001512949 | 0.160     | 2800.71            | 3129.62        |
| ENSG00000182087 | TMEM259     | 0.001559753 | -0.271    | 3267.01            | 2706.68        |
| ENSG00000108344 | PSMD3       | 0.001612799 | -0.197    | 3496.06            | 3050.28        |
| ENSG00000143476 | DTL         | 0.001660294 | -0.935    | 459.94             | 240.10         |
| ENSG00000165355 | FBXO33      | 0.001661081 | 0.230     | 2044.37            | 2397.95        |
| ENSG00000153094 | BCL2L11     | 0.001673749 | 0.298     | 827.65             | 1017.76        |
| ENSG00000166888 | STAT6       | 0.001688267 | -0.101    | 9313.84            | 8684.87        |
| ENSG00000260000 |             | 0.001766563 | 1.540     | 15.83              | 47.68          |
| ENSG00000075702 | WDR62       | 0.001839966 | -0.736    | 418.90             | 251.22         |
| ENSG00000106052 | TAX1BP1     | 0.001886585 | 0.117     | 5864.08            | 6359.45        |
| ENSG00000179833 | SERTAD2     | 0.001928853 | 0.440     | 3017.33            | 4094.58        |
| ENSG00000197905 | TEAD4       | 0.001965572 | 0.782     | 126.08             | 217.36         |
| ENSG00000287378 |             | 0.001989608 | 1.852     | 8.99               | 34.70          |
| ENSG00000196937 | FAM3C       | 0.002222787 | 0.304     | 2178.58            | 2688.88        |
| ENSG00000065328 | MCM10       | 0.002239219 | -0.895    | 138.11             | 73.86          |
| ENSG00000122884 | P4HA1       | 0.002301279 | 0.273     | 3621.37            | 4376.03        |
| ENSG00000080503 | SMARCA2     | 0.002594499 | 0.140     | 7861.32            | 8661.30        |
| ENSG00000129219 | PLD2        | 0.002839806 | -0.252    | 1389.95            | 1167.02        |
| ENSG00000167766 | ZNF83       | 0.002905434 | -0.283    | 1113.40            | 915.11         |
| ENSG00000215271 | HOMEZ       | 0.002949953 | -0.422    | 443.89             | 331.10         |
| ENSG00000254535 | PABPC4L     | 0.003120501 | 1.008     | 62.50              | 126.60         |
| ENSG00000228544 | CCDC183-AS1 | 0.003227741 | 1.290     | 25.83              | 64.38          |
| ENSG00000101945 | SUV39H1     | 0.00330342  | -0.939    | 279.56             | 145.35         |
| ENSG00000134186 | PRPF38B     | 0.003316199 | 0.315     | 678.64             | 844.51         |
| ENSG00000085063 | CD59        | 0.003434655 | 0.052     | 28798.19           | 29857.63       |
| ENSG00000101654 | RNMT        | 0.003683609 | 0.205     | 2153.42            | 2481.78        |
| ENSG00000104872 | PIH1D1      | 0.00374158  | -0.255    | 1787.22            | 1497.58        |
| ENSG00000051620 | HEBP2       | 0.004116055 | -0.209    | 1782.68            | 1542.47        |
| ENSG00000027697 | IFNGR1      | 0.004122644 | 0.230     | 2499.05            | 2930.42        |
| ENSG00000182903 | ZNF721      | 0.004761544 | 0.337     | 526.74             | 665.45         |
| ENSG00000073756 | PTGS2       | 0.005013198 | 0.424     | 4433.33            | 5950.10        |
| ENSG00000102554 | KLF5        | 0.005279522 | 1.216     | 145.90             | 340.04         |
| ENSG00000185000 | DGAT1       | 0.00529461  | -0.460    | 537.48             | 390.63         |
| ENSG00000225578 | NCBP2-AS1   | 0.005501976 | 2.691     | 2.35               | 19.86          |
| ENSG00000173272 | MZT2A       | 0.005670919 | -0.339    | 1086.34            | 858.87         |
| ENSG00000258655 | ARHGAP5-AS1 | 0.005756563 | 1.783     | 17.93              | 63.81          |
| ENSG00000174695 | TMEM167A    | 0.005793351 | 0.144     | 3165.09            | 3497.82        |
| ENSG00000183597 | TANGO2      | 0.005893314 | -0.236    | 1731.80            | 1470.09        |
| ENSG00000184897 | H1-10       | 0.005957187 | -0.308    | 2070.46            | 1671.95        |

| Gene id         | Symbol     | FDR         | logPostFC | Control mean count | MMW mean count |
|-----------------|------------|-------------|-----------|--------------------|----------------|
| ENSG00000126247 | CAPNS1     | 0.005987746 | -0.251    | 6135.92            | 5155.53        |
| ENSG00000222112 | RN7SKP16   | 0.006494578 | -2.121    | 25.56              | 5.21           |
| ENSG00000105486 | LIG1       | 0.006664505 | -0.384    | 827.13             | 633.49         |
| ENSG00000240729 |            | 0.006701092 | 2.137     | 4.71               | 23.67          |
| ENSG00000113594 | LIFR       | 0.006949383 | 0.371     | 994.66             | 1286.99        |
| ENSG00000124207 | CSE1L      | 0.007346929 | -0.277    | 2989.18            | 2466.52        |
| ENSG00000135446 | CDK4       | 0.007775496 | -0.136    | 3940.79            | 3587.29        |
| ENSG00000158125 | XDH        | 0.007902956 | -1.080    | 85.48              | 39.98          |
| ENSG00000132763 | MMACHC     | 0.007942065 | -0.538    | 256.45             | 176.42         |
| ENSG00000111530 | CAND1      | 0.008433521 | 0.104     | 6181.41            | 6644.66        |
| ENSG00000071189 | SNX13      | 0.008489151 | 0.146     | 3176.34            | 3515.90        |
| ENSG00000143333 | RGS16      | 0.008647566 | -0.521    | 306.53             | 213.41         |
| ENSG00000161547 | SRSF2      | 0.009042491 | -0.270    | 2993.43            | 2482.61        |
| ENSG00000148154 | UGCG       | 0.00923699  | 0.686     | 1923.51            | 3095.17        |
| ENSG00000166526 | ZNF3       | 0.009500954 | -0.289    | 891.58             | 729.52         |
| ENSG00000184232 | OAF        | 0.009808406 | -0.345    | 2910.96            | 2292.33        |
| ENSG00000180884 | ZNF792     | 0.010264071 | -0.571    | 317.31             | 213.27         |
| ENSG00000154114 | TBCEL      | 0.010559971 | 0.359     | 884.39             | 1134.71        |
| ENSG00000114978 | MOB1A      | 0.010849542 | 0.105     | 6329.65            | 6809.21        |
| ENSG00000136720 | HS6ST1     | 0.01167779  | 0.336     | 551.21             | 695.93         |
| ENSG00000103061 | SLC7A6OS   | 0.011695176 | -0.390    | 591.17             | 450.89         |
| ENSG00000131153 | GINS2      | 0.012360899 | -0.980    | 132.94             | 66.98          |
| ENSG00000120328 | PCDHB12    | 0.012525773 | -1.291    | 51.50              | 20.53          |
| ENSG00000134690 | CDCA8      | 0.012649369 | -0.788    | 193.49             | 111.70         |
| ENSG00000177602 | HASPIN     | 0.012793754 | -0.646    | 191.50             | 122.04         |
| ENSG00000168303 | MPLKIP     | 0.013443908 | 0.520     | 227.03             | 325.94         |
| ENSG00000129925 | PGAP6      | 0.013450411 | -0.151    | 3640.64            | 3278.91        |
| ENSG00000246695 | RASSF8-AS1 | 0.013510994 | 0.543     | 452.77             | 659.94         |
| ENSG00000130749 | ZC3H4      | 0.013670006 | 0.270     | 1143.43            | 1378.53        |
| ENSG00000146373 | RNF217     | 0.013919033 | 0.279     | 834.80             | 1012.77        |
| ENSG00000166266 | CUL5       | 0.013943981 | 0.244     | 1921.23            | 2276.07        |
| ENSG00000151208 | DLG5       | 0.01443676  | 0.141     | 3233.58            | 3566.87        |
| ENSG00000248593 | DSTNP2     | 0.014964553 | -0.779    | 146.82             | 85.17          |
| ENSG00000175287 | PHYHD1     | 0.015749957 | -0.687    | 222.47             | 137.86         |
| ENSG00000286656 |            | 0.015925921 | -2.542    | 40.69              | 6.27           |
| ENSG00000275221 | H2AC15     | 0.016505242 | -0.801    | 305.36             | 174.93         |
| ENSG00000213281 | NRAS       | 0.017133481 | 0.187     | 2712.41            | 3088.26        |
| ENSG00000180139 | ACTA2-AS1  | 0.017957069 | -2.238    | 20.61              | 3.69           |
| ENSG00000175137 | SH3BP5L    | 0.01801007  | -0.317    | 1764.13            | 1415.60        |
| ENSG00000165312 | OTUD1      | 0.019358314 | 0.527     | 848.06             | 1222.22        |
| ENSG00000103152 | MPG        | 0.019366431 | -0.192    | 3398.02            | 2973.81        |
| ENSG00000167562 | ZNF701     | 0.01996541  | 0.421     | 297.52             | 398.60         |
| ENSG00000264278 | ZNF236-DT  | 0.019983655 | -1.212    | 53.51              | 22.61          |
| ENSG00000116688 | MFN2       | 0.020513769 | -0.158    | 4441.44            | 3979.25        |

| Gene id         | Symbol    | FDR         | logPostFC | Control mean count | MMW mean count |
|-----------------|-----------|-------------|-----------|--------------------|----------------|
| ENSG00000182107 | TMEM30B   | 0.021067236 | 0.550     | 213.02             | 312.29         |
| ENSG00000126804 | ZBTB1     | 0.021341458 | 0.155     | 2515.25            | 2799.73        |
| ENSG00000113300 | CNOT6     | 0.021937628 | 0.293     | 991.94             | 1215.67        |
| ENSG00000166582 | CENPV     | 0.023664961 | -1.464    | 49.22              | 17.29          |
| ENSG00000100307 | CBX7      | 0.02376915  | 0.373     | 481.65             | 624.16         |
| ENSG00000174996 | KLC2      | 0.024131754 | -0.302    | 890.24             | 722.08         |
| ENSG00000137449 | CPEB2     | 0.024853982 | 0.366     | 1111.62            | 1432.43        |
| ENSG00000160055 | TMEM234   | 0.025060365 | -0.432    | 442.64             | 327.93         |
| ENSG00000115652 | UXS1      | 0.025301218 | 0.233     | 1008.19            | 1185.28        |
| ENSG00000283959 |           | 0.026483615 | -1.582    | 34.51              | 10.95          |
| ENSG00000102910 | LONP2     | 0.027611647 | -0.124    | 4459.44            | 4093.47        |
| ENSG00000107036 | RIC1      | 0.027845028 | 0.242     | 2612.79            | 3089.63        |
| ENSG00000245552 |           | 0.028128226 | -2.191    | 27.03              | 5.25           |
| ENSG00000110218 | PANX1     | 0.028761825 | 0.291     | 1983.32            | 2426.44        |
| ENSG00000146950 | SHROOM2   | 0.029497132 | 3.525     | 0.48               | 14.62          |
| ENSG00000103657 | HERC1     | 0.029738767 | 0.140     | 4943.43            | 5448.32        |
| ENSG00000049323 | LTBP1     | 0.029825125 | -0.329    | 8893.86            | 7079.77        |
| ENSG00000111602 | TIMELESS  | 0.029840819 | -0.565    | 603.43             | 407.55         |
| ENSG00000155592 | ZKSCAN2   | 0.030260933 | 0.341     | 445.19             | 564.03         |
| ENSG00000171862 | PTEN      | 0.030660734 | 0.128     | 5616.42            | 6139.26        |
| ENSG00000166508 | MCM7      | 0.031103586 | -0.437    | 2411.41            | 1780.56        |
| ENSG00000172890 | NADSYN1   | 0.031391718 | -0.186    | 2473.40            | 2174.45        |
| ENSG00000064651 | SLC12A2   | 0.032079898 | 0.228     | 1477.97            | 1731.02        |
| ENSG00000224420 | ADM5      | 0.033340859 | 3.511     | 0.46               | 14.23          |
| ENSG00000287126 |           | 0.034006525 | 1.215     | 20.78              | 49.40          |
| ENSG00000135624 | CCT7      | 0.035816354 | -0.103    | 6102.40            | 5681.49        |
| ENSG00000175066 | GK5       | 0.036396889 | 0.263     | 759.36             | 911.58         |
| ENSG00000101199 | ARFGAP1   | 0.037630973 | -0.145    | 3190.54            | 2884.46        |
| ENSG00000144452 | ABCA12    | 0.040788307 | -1.442    | 37.05              | 13.10          |
| ENSG00000122952 | ZWINT     | 0.041263452 | -0.827    | 447.14             | 251.63         |
| ENSG00000136869 | TLR4      | 0.043161947 | 0.371     | 2421.84            | 3132.79        |
| ENSG00000111665 | CDCA3     | 0.04336622  | -0.944    | 241.00             | 124.89         |
| ENSG00000272734 | ADIRF-AS1 | 0.044362654 | 0.655     | 97.43              | 153.87         |
| ENSG00000126254 | RBM42     | 0.045467986 | -0.215    | 1408.83            | 1213.89        |
| ENSG00000123870 | ZNF137P   | 0.047885986 | -1.205    | 49.63              | 21.04          |
| ENSG00000187741 | FANCA     | 0.049002734 | -0.744    | 224.21             | 133.48         |
